# Supplementary material for: Reading between the Lines: RNA-seq Data Mining Reveals the Alternative Message of the Rice Leaf Transcriptome in Response to Heat Stress
Source: MDPI journal article supplement (doi:10.3390/plants10081647), 2021-08-11
Supplement: s1 [file s1]

Supplementary File 1

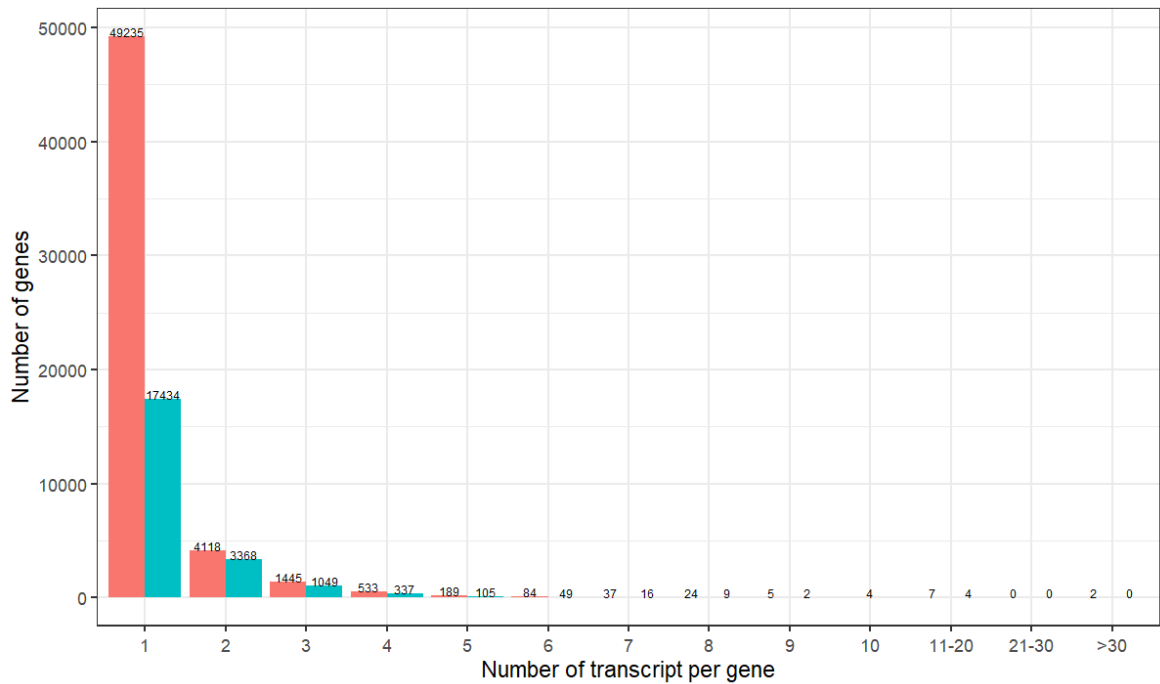

**Figure S1.** Distribution of the number of genes (y-axis) per number of transcripts per gene (x-axis) before (red) and after (blue) filtering low expressed transcripts and genes using the RNA-seq data extracted from Luo et al. [60] (Experiment 3).

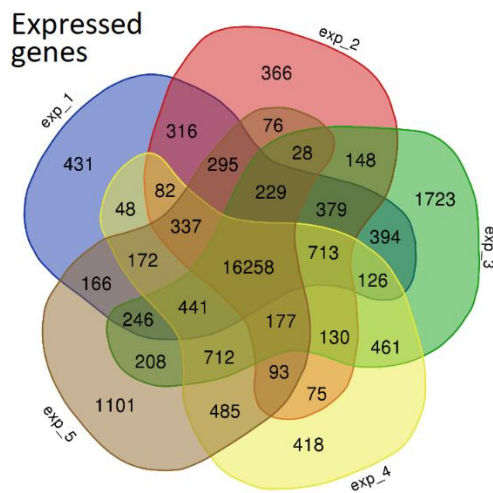

**Figure S2.** Venn diagram showing the overlap of expressed genes from each experiment analysed here.

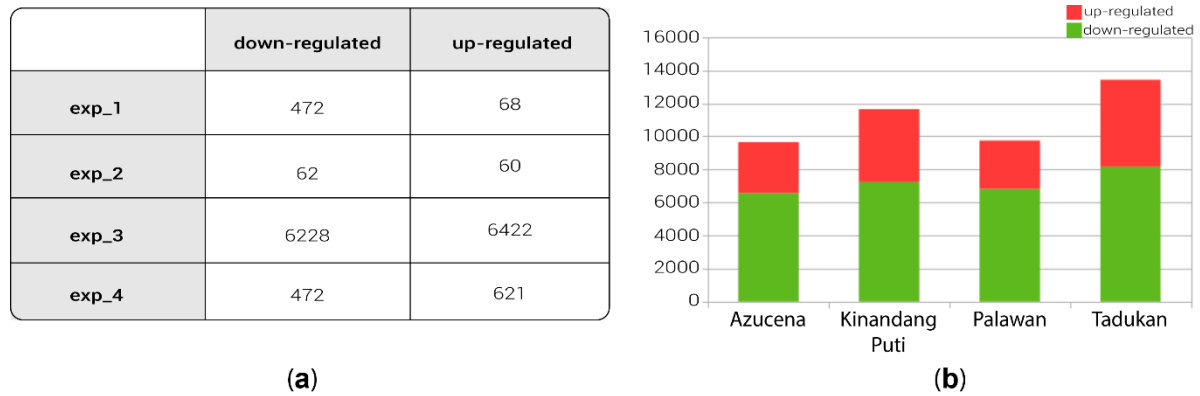

**Figure S3.** Number of up- and down-regulated genes. (a) Data from experiments 1, 2, 3 and 4. (b) Data from each rice cultivar analysed in experiment 5. y-axis = number of genes.

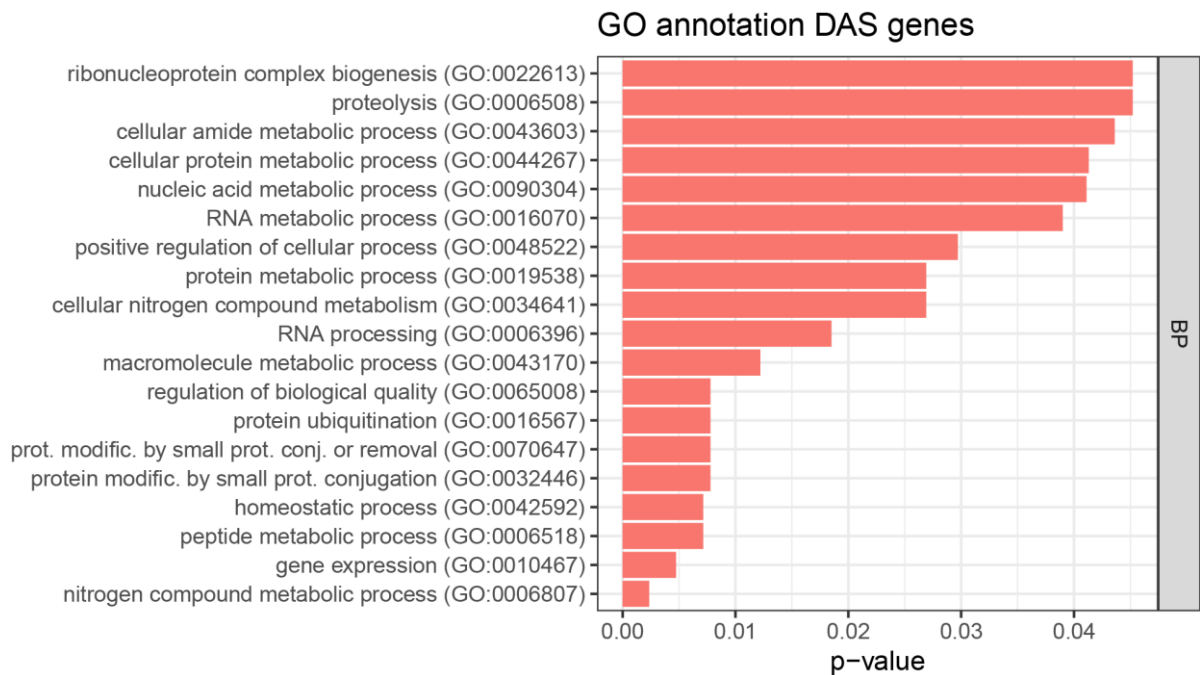

**Figure S4.** GO analysis of DAS genes identified in Experiment 3. The GO statistical overrepresentation test was carried out in Panther (<http://pantherdb.org/>) with the annotation set 'GO biological process complete' (BP). The reference list contained 4,349 expressed, multi-transcript (more than one isoform) and non-DAS genes from Experiment 3. The significantly enriched terms and associated  $p$ -values  $>0.5$  were uploaded to 3D RNA-seq App [65] that generated the plot above.

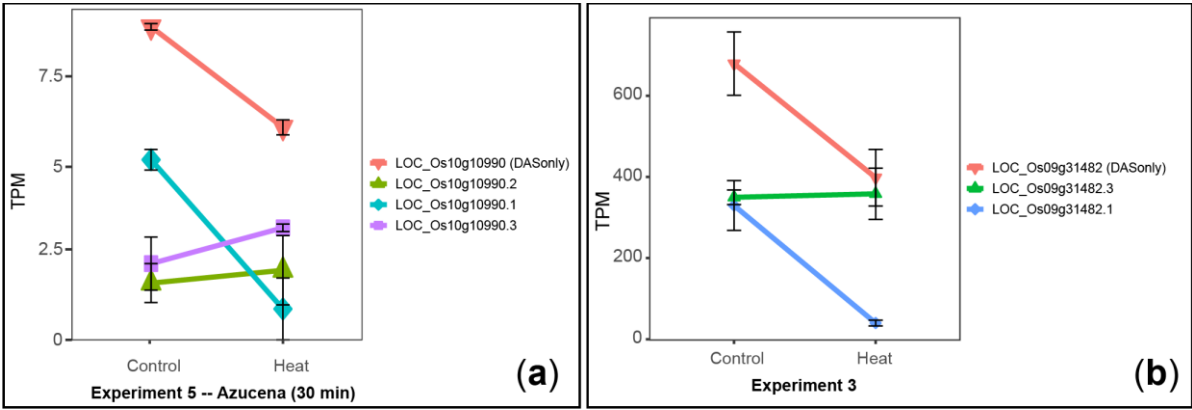

**Figure S5.** Heat-induced changes in transcript expression of two DAS genes. (a) LOC\_Os10g10990. (b) *OsC3H60* (LOC\_Os09g31482). Error bars: SEM.

**Table S1.** Sequencing information for each study analysed here.

| Experiment | SRA Study | Number of datasets extracted | Average read length | Average number of reads | Biological replicates |
|------------|-----------|------------------------------|---------------------|-------------------------|-----------------------|
| 1          | SRP071314 | 24                           | 100 bp              | 37M                     | 2                     |
| 2          | SRP101342 | 4                            | 50 bp               | 32M                     | 2                     |
| 3          | SRP190858 | 6                            | 297 bp              | 25M                     | 3                     |
| 4          | SRP110860 | 4                            | 150 bp              | 37M                     | 2                     |
| 5          | SRP065945 | 307                          | 102 bp              | 40M                     | 2                     |
